# Supplementary material for: Root defense analysis against Fusarium oxysporum reveals new regulators to confer resistance
Source: PubMed Central journal article supplement (PMC4083284; doi:10.1038/srep05584), 2014-07-07
Supplement: srep05584-s1.pdf [file srep05584-s1.pdf]

**Root defense analyses against *Fusarium oxysporum* reveals new regulators to confer resistance**

Yi Chung Chen, Chin Lin Wong, Frederico Muzzi, Ido Vlaardingerbroek, Brendan N. Kidd, Peer M. Schenk\*

Plant-Microbe Interactions Laboratory,  
School of Agriculture and Food Sciences,  
The University of Queensland, Brisbane,  
Queensland 4072, Australia

\*Corresponding author email:

[p.schenk@uq.edu.au](mailto:p.schenk@uq.edu.au)

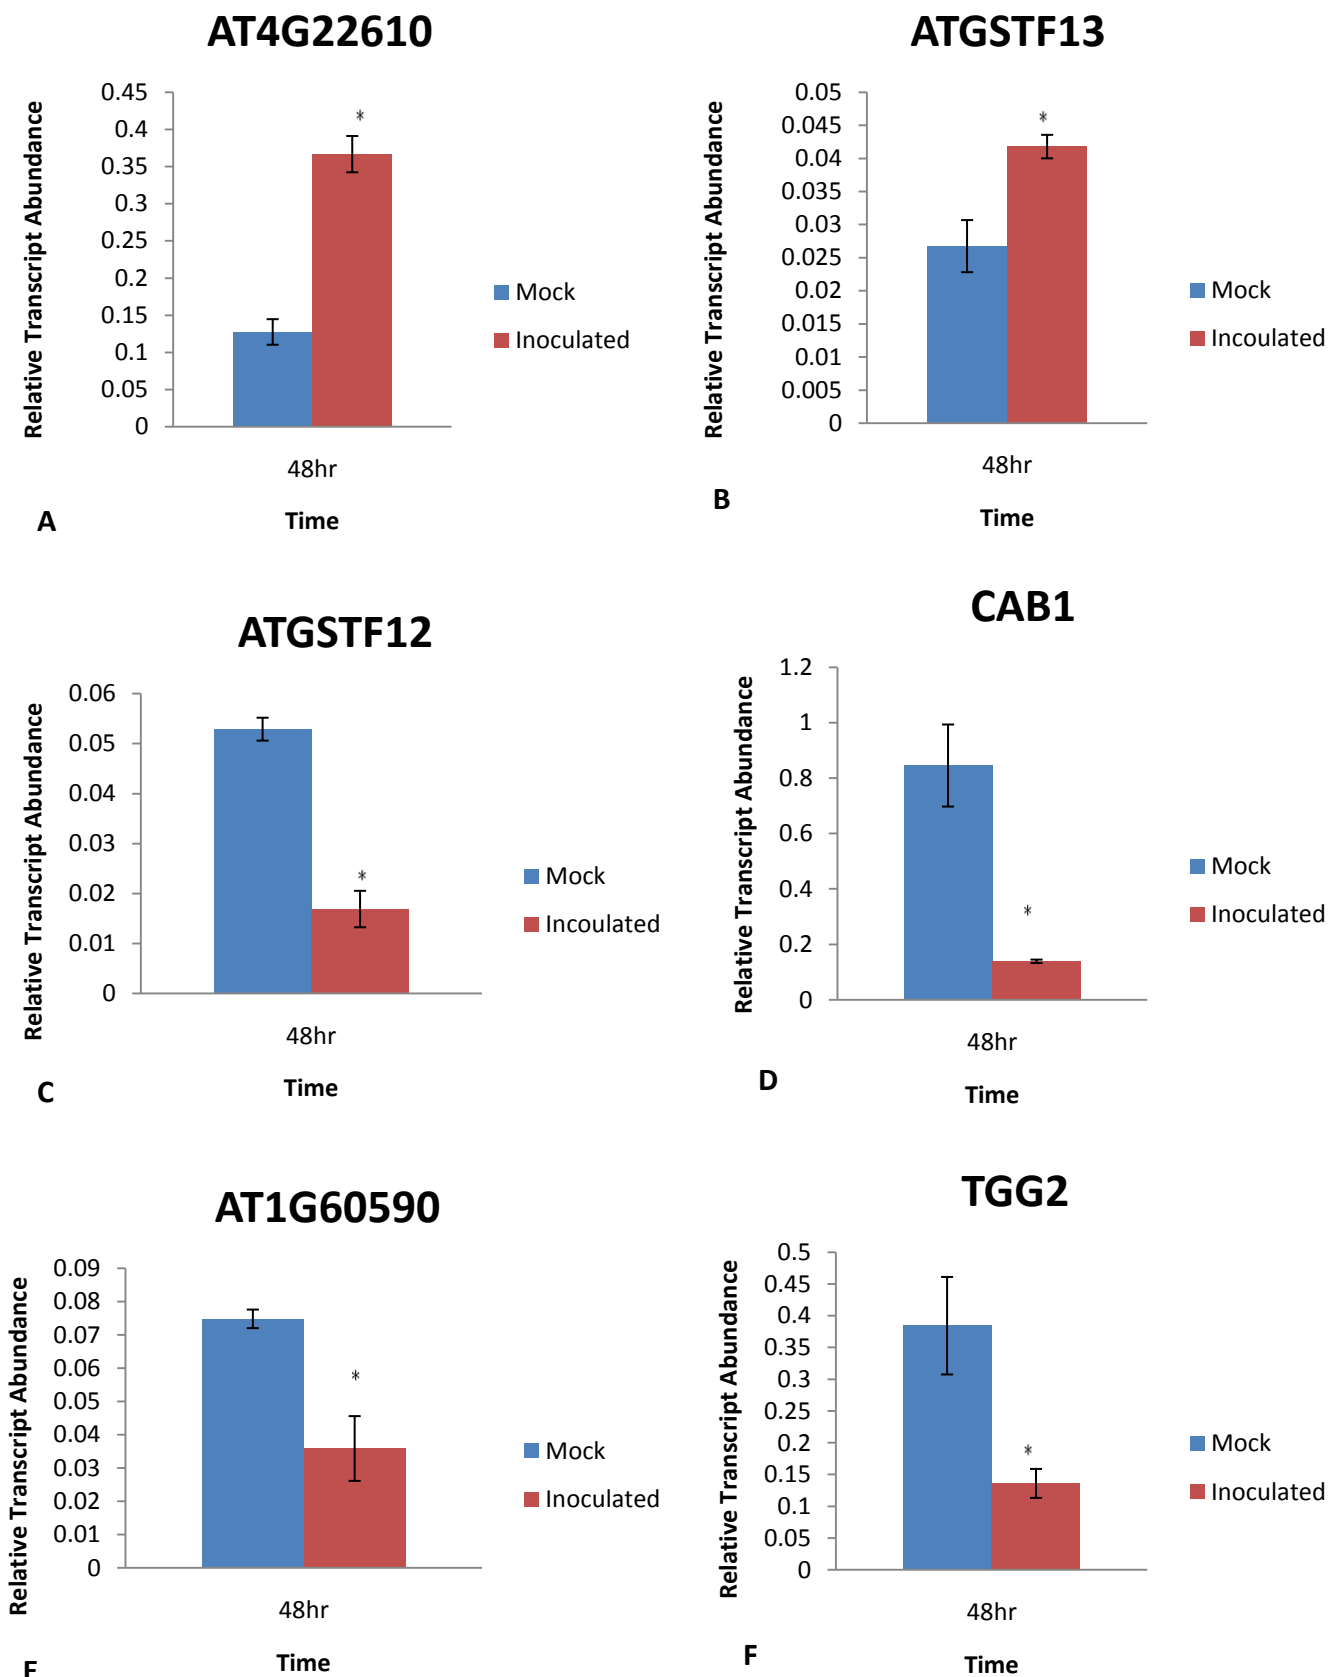

**Supplementary Figure 1 (A-F). Differential gene expression in *Arabidopsis* roots following infection by *Fusarium oxysporum* at 48 h post inoculation compared to mock treatment.** Shown are qRT-PCR data from three independent biological replicates, each containing a pool of 40 plants.

## ATEBP

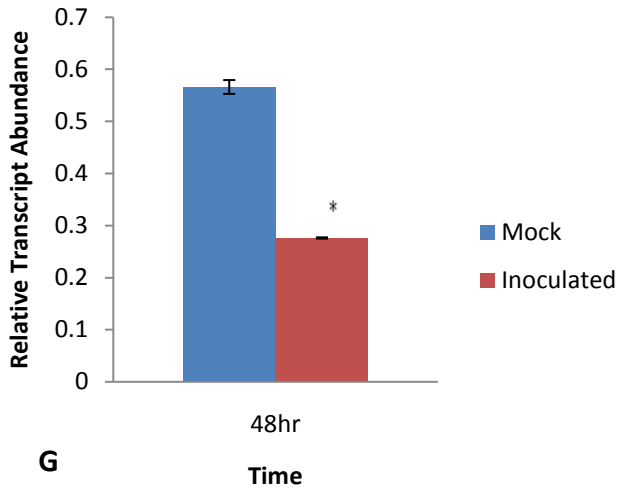

## GAPA

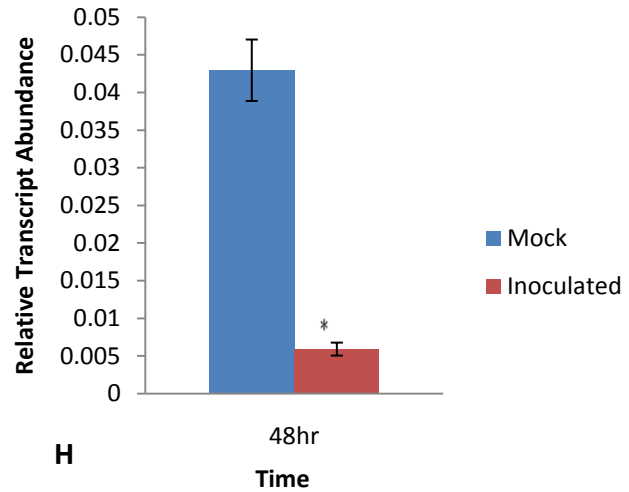

## APE2

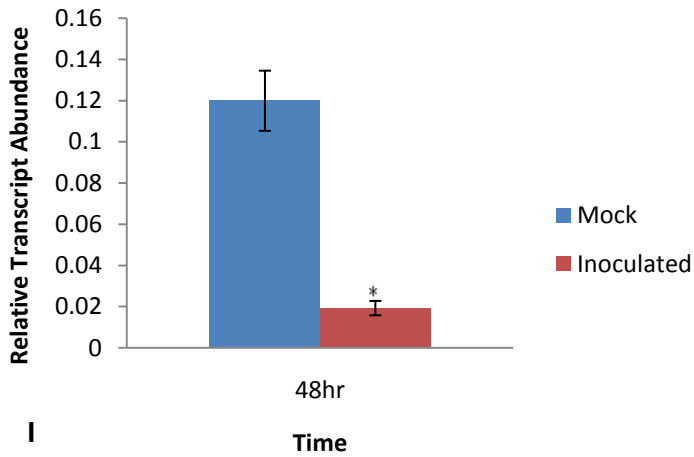

## AT3G50440

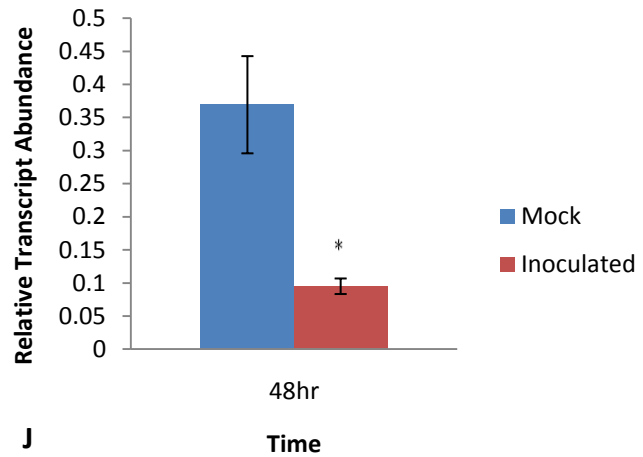

## AT5G62630

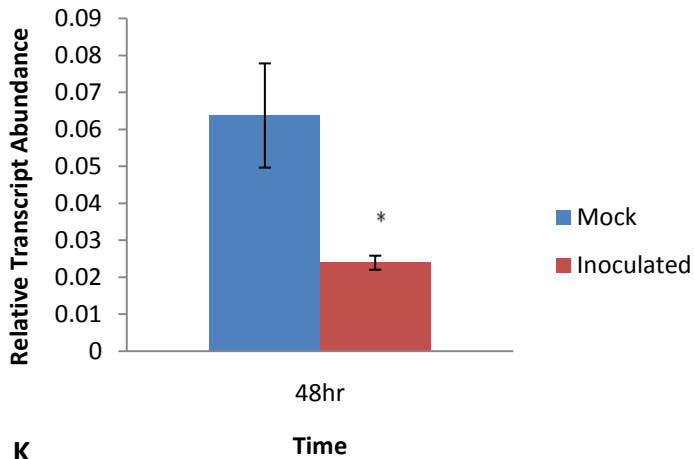

**Supplementary Figure 1 (G-K). Differential gene expression in *Arabidopsis* roots following infection by *Fusarium oxysporum* at 48 h post inoculation compared to mock treatment.** Shown are qRT-PCR data from three independent biological replicates, each containing a pool of 40 plants.

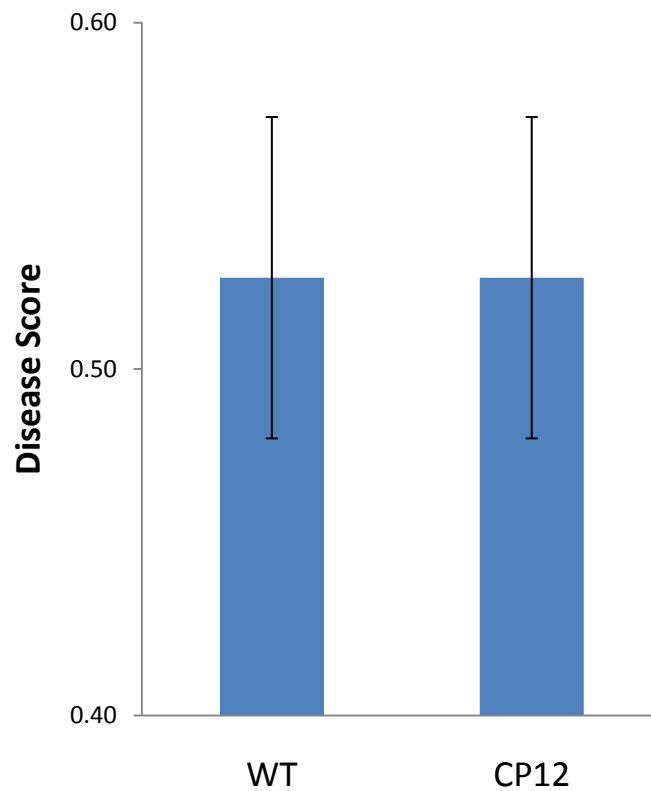

**Supplementary Figure 2. Disease score for *cp12* mutant.** The disease score represent the average proportion of symptomatic leaves per total leaves per plant. Bars represent mean values  $\pm$ SE of three independent replicates of 10 pooled plants each.

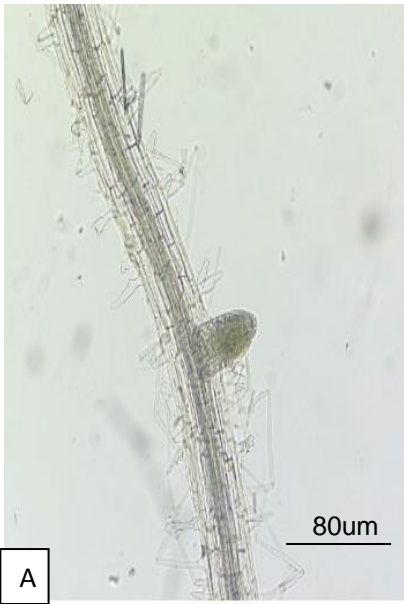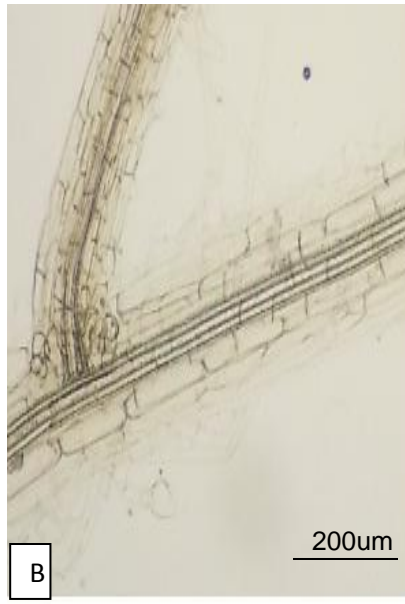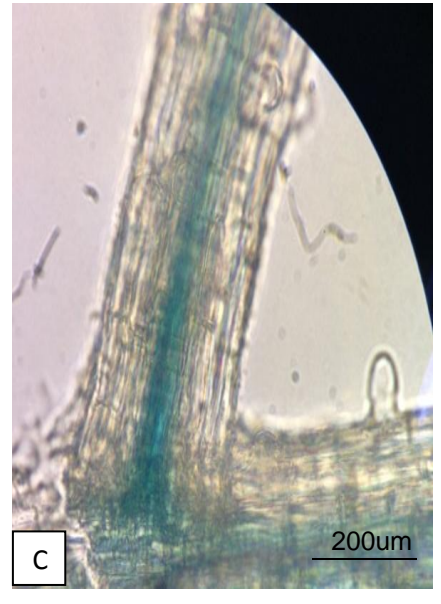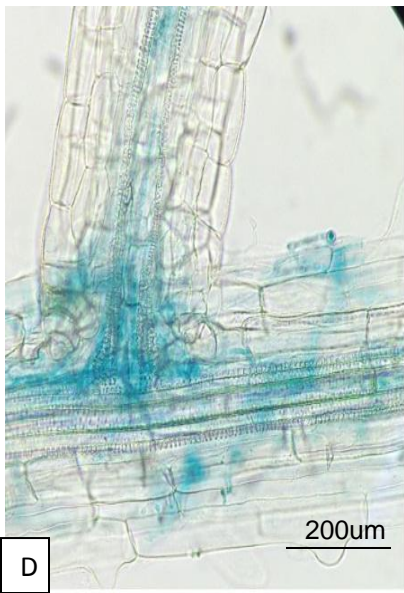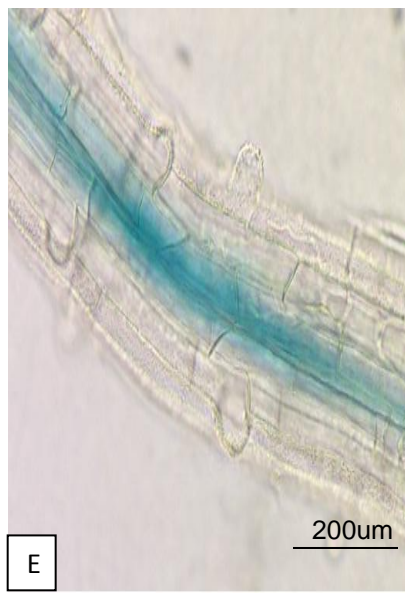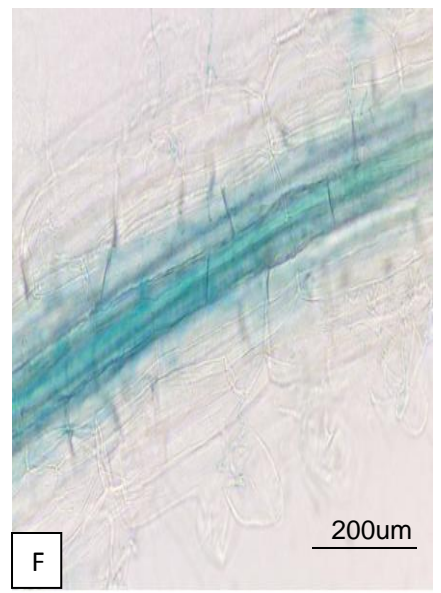

**Supplementary Figure 3. GUS expression of *F. oxysporum* hyphae colonizing WT & *erf72* *Arabidopsis* plants.** (A) Mock control of WT (Col-0) plant root (B) Mock control of *erf72* root (C,E) *F. oxysporum* expression on WT (Col-0) plant root (D, F) *F. oxysporum* expression on *erf72* root

**Supplementary Table 1.** *Arabidopsis thaliana* genes found to be significantly repressed more than 1.5 fold but less than 2 fold in *F. oxysporum*-infected roots compared to mock-inoculated roots.

| Common Name | Unique ID | Avg. Norm A | Avg. Norm M  | Anti-Log2  | T-test   |
|-------------|-----------|-------------|--------------|------------|----------|
| ATGLR1.4    | AT3G07520 | 10.90997409 | -0.992360186 | 0.50279171 | 5.10E-04 |
| PIF4        | AT2G43010 | 10.21801438 | -0.969815465 | 0.51082637 | 1.85E-03 |
| CP12-1      | AT2G47400 | 12.53256093 | -0.971965298 | 0.51700732 | 3.42E-03 |
| THI1        | AT5G54770 | 12.89884341 | -0.939209136 | 0.53200985 | 4.25E-02 |
| CAT3        | AT1G20620 | 15.49393219 | -0.904881022 | 0.53343576 | 4.60E-02 |
| AT4G00780   | AT4G00780 | 11.51466893 | -0.883622123 | 0.54372252 | 1.73E-02 |
| PETC        | AT4G03280 | 10.66825751 | -0.883008036 | 0.54434555 | 2.38E-02 |
| AT1G03495   | AT1G03495 | 9.496486977 | -0.743745497 | 0.54998874 | 4.92E-02 |
| LSH1        | AT5G28490 | 11.86556314 | -0.872726376 | 0.5502214  | 6.17E-03 |
| AT3G45160   | AT3G45160 | 14.51579788 | -0.913964297 | 0.55135116 | 2.76E-02 |
| AT4G12470   | AT4G12470 | 10.03300689 | -0.852410503 | 0.55155468 | 2.67E-02 |
| KNAT1       | AT4G08150 | 10.91861785 | -0.828291112 | 0.56581149 | 1.79E-02 |
| ATSEH       | AT2G26740 | 10.58346439 | -0.809967833 | 0.56985825 | 1.07E-02 |
| AT4G07742   | AT4G07742 | 9.557648475 | -0.767509114 | 0.5698831  | 7.88E-03 |
| AT2G26500   | AT2G26500 | 10.49190973 | -0.802574519 | 0.57330504 | 2.52E-02 |
| CYP71B18    | AT3G26165 | 11.53007984 | -0.802929824 | 0.5750255  | 8.29E-03 |
| AT1G16260   | AT1G16260 | 10.69933918 | -0.786112063 | 0.58119209 | 1.40E-02 |
| AT1G67860   | AT1G67860 | 13.27946538 | -0.805542531 | 0.5813031  | 3.69E-02 |
| STM         | AT1G62360 | 9.194569673 | -0.735234507 | 0.5898456  | 6.24E-03 |
| AT5G53820   | AT5G53820 | 12.39010203 | -0.758351983 | 0.59708255 | 7.29E-03 |
| CYP96A12    | AT4G39510 | 10.15925678 | -0.736005573 | 0.59794424 | 2.39E-02 |
| AT1G52220   | AT1G52220 | 10.10916329 | -0.741388883 | 0.598628   | 4.15E-02 |
| ACD32.1     | AT1G06460 | 11.19655375 | -0.729134803 | 0.60424372 | 1.93E-02 |
| AT5G19140   | AT5G19140 | 11.41074788 | -0.724714086 | 0.60590691 | 4.08E-02 |
| CYP706A1    | AT4G22690 | 12.33643292 | -0.739199264 | 0.60609912 | 2.40E-02 |
| AT3G23290   | AT3G23290 | 10.89046414 | -0.714788319 | 0.6071095  | 2.61E-02 |
| AT5G62350   | AT5G62350 | 15.71685427 | -0.68522096  | 0.60860915 | 1.54E-03 |
| AT3G18080   | AT3G18080 | 12.48067394 | -0.728013468 | 0.60997247 | 1.31E-02 |
| PDC2        | AT5G54960 | 13.3931817  | -0.746226418 | 0.61135899 | 2.91E-02 |
| AT3G18080   | AT3G18080 | 12.56235442 | -0.720302704 | 0.61439658 | 2.27E-02 |
| COR15A      | AT2G42540 | 10.20752672 | -0.723098148 | 0.61591081 | 4.32E-02 |
| AT1G45191   | AT1G45191 | 9.511259815 | -0.639283614 | 0.61688749 | 3.39E-02 |
| ATLFNR1     | AT5G66190 | 10.56278075 | -0.694105891 | 0.61834072 | 4.37E-02 |
| TT7         | AT5G07990 | 9.806462436 | -0.694487065 | 0.6183493  | 1.22E-02 |
| AT5G50510   | AT5G50510 | 10.192071   | -0.684085699 | 0.62177479 | 2.03E-02 |
| TIR         | AT1G72930 | 10.94509293 | -0.689907215 | 0.62258296 | 4.37E-02 |
| AT5G19940   | AT5G19940 | 11.68141518 | -0.688740715 | 0.62427692 | 4.60E-02 |
| AT1G19960   | AT1G19960 | 12.17855794 | -0.690124895 | 0.62468577 | 4.80E-02 |
| AT3G54260   | AT3G54260 | 14.55629356 | -0.74019079  | 0.62728213 | 2.33E-02 |
| AT5G59305   | AT5G59305 | 9.467364599 | -0.660384294 | 0.62942852 | 2.86E-02 |
| AT3G61490   | AT3G61490 | 12.2275336  | -0.68123955  | 0.62981052 | 2.72E-02 |
| FED A       | AT1G60950 | 12.82728076 | -0.683352142 | 0.63251798 | 3.96E-02 |
| AT4G22485   | AT4G22485 | 11.53699906 | -0.662438708 | 0.63418704 | 1.34E-02 |
| ANAC036     | AT2G17040 | 10.5991472  | -0.651908295 | 0.64165407 | 3.81E-02 |
| AT1G67865   | AT1G67865 | 11.92794348 | -0.646129469 | 0.64362813 | 2.28E-02 |
| AT1G48300   | AT1G48300 | 12.94556129 | -0.655765098 | 0.64415755 | 5.36E-03 |
| PAP2        | AT4G29080 | 12.54534803 | -0.649991462 | 0.64419446 | 2.87E-02 |
| ETR2        | AT3G23150 | 11.17215535 | -0.639792324 | 0.64531372 | 4.08E-02 |
| AT5G09530   | AT5G09530 | 14.87088136 | -0.698956032 | 0.64587358 | 2.81E-02 |
| PAP1        | AT1G56650 | 9.585163256 | -0.568518217 | 0.64656728 | 1.54E-02 |
| AT5G02160   | AT5G02160 | 10.6269218  | -0.639530775 | 0.64726659 | 3.21E-02 |
| AT1G14890   | AT1G14890 | 15.08703144 | -0.687626188 | 0.64990715 | 3.27E-02 |
| AT4G37550   | AT4G37550 | 10.61838005 | -0.620960947 | 0.65215046 | 1.73E-03 |
| FDH         | AT5G14780 | 12.82871652 | -0.641930561 | 0.6535428  | 4.85E-02 |
| AT5G64110   | AT5G64110 | 10.42940848 | -0.602543596 | 0.65694209 | 2.97E-02 |
| AT1G54410   | AT1G54410 | 15.77101126 | -0.527071693 | 0.65737292 | 2.42E-06 |
| AT1G19530   | AT1G19530 | 13.04807484 | -0.630189879 | 0.66034258 | 3.64E-02 |

## **SUPPLEMENTARY FIGURE LEGENDS**

**Supplementary Figure 1. Differential gene expression in *Arabidopsis* roots following infection by *Fusarium oxysporum* at 48 h post inoculation compared to mock treatment.** Shown are qRT-PCR data from three independent biological replicates, each containing a pool of 40 plants.

**Supplementary Figure 2. Disease score for *cp12* mutant.** The disease score represent the average proportion of symptomatic leaves per total leaves per plant. Bars represent mean values  $\pm$ SE of three independent replicates of 10 pooled plants each.

**Supplementary Figure 3. GUS expression of *F. oxysporum* hyphae colonizing WT & *erf72* *Arabidopsis* plants.** (A) Mock control of WT (Col-0) plant root (B) Mock control of *erf72* root (C,E) *F. oxysporum* expression on WT (Col-0) plant root (D, F) *F. oxysporum* expression on *erf72* root

**Supplementary Table 1. *Arabidopsis thaliana* genes found to be significantly repressed more than 1.5 fold but less than 2 fold in *F. oxysporum*-infected roots compared to mock-inoculated roots.**
